# Supplementary material
Source: publisher site journal article supplement (https://www.spandidos-publications.com/5534/downloadSupplementary)
Supplement: Supplementary file 1 [file downloadSupplementary]

## Sheet: Table S2
Table SII. Literature review of published case reports regarding gene detection and immunohistochemistry.
Literature	Sex	Age, years	Follow-up	Gene detection																		IHC (Primary)
				IDH	tp53	ATRX	EGFR	PTEN	1p19q	H3	H3.3	H3F3A	TERT	MGMT	BRAF	PTEN	NF1	NOTCH	INI-1	DNMT3A	RB1	phosphoneurofilaments		Syn		GFAP		OLIG2		Ki-67		p53		ATRX	CD56		CD99		NeuN		vimentin		NCAM		IDH		CgA		CD20
																						glial component	primitive neuronal component	glial component	primitive neuronal component	glial component	primitive neuronal component	glial component	primitive neuronal component	glial component	primitive neuronal component	glial component	primitive neuronal component		glial component	primitive neuronal component	glial component	primitive neuronal component	glial component	primitive neuronal component	glial component	primitive neuronal component	glial component	primitive neuronal component	glial component	primitive neuronal component	glial component	primitive neuronal component	glial component
Donabedian P et al, 2021 (3)	Female	62	6 months, Dead	wildtype		wildtype								unmethylation												(+)	(+)
Donabedian P et al, 2021 (3)	Female	52	6 months, Alive	wildtype		wildtype								unmethylation											(+)	(+)	(-)				very high
Valbuena S et al, 2021 (4)	Male	57	14 months, Dead	wildtype	wildtype	wildtype			noncodeletion					unmethylation					wildtype									focally (+)			0.95		＜10%							(-)						(-)
Poyuran R et al, 2021 (5)	Female	11		wildtype	mutant	wildtype				wildtype	wildtype													(-)	(+)	(+)	(-)	(+)	(-)
Poyuran R et al, 2021 (5)	Male	48	10 months, Alive	wildtype	mutant	wildtype				wildtype	wildtype													(-)	(+)	(+)	(-)	(+)	(-)
Poyuran R et al, 2021 (5)	Male	36	1 month, Alive	mutant	mutant	mutant				wildtype	wildtype													(-)	(+)	(+)	(-)	(+)	(-)
Shayganfar A et al, 2020 (6)	Male	71																							(+)	(+)																							(-)
Tan CH et al 2017 (8)	Female	0.25	7 months, Alive	wildtype																				(-)	(+)	(+)	(-)			＜20%	＞20%							(+)			(+)				(-)
Vollmer K et al, 2019 (9)	Male	47		wildtype	mutant	mutant																			partial (+)		(-)									partial (+)		partial (+)		partial (+)		partial (+)
Rong T et al, 2021 (10)	Male	20	15 months, Dead	wildtype	mutant				noncodeletion				wildtype	unmethylation	wildtype					mutant
Vaidya MM et al, 2022 (12)	Female	27		mutant	mutant		wildtype	wildtype	noncodeletion					methylation																30%-32%	92%-94%	strong positivity		loss of nuclear expression
Tamai S et al, 2019 (13)	Male	49	12 months, Dead	wildtype	wildtype				noncodeletion			wildtype	mutant	methylation	wildtype										partial (+)		(-)				0.8													diffusely positive				(-)
Sánchez-Ortega JF et al, 2020 (14)	Female	77	1 month, Dead	wildtype					noncodeletion					methylation										(-)	(+)	(+)	low(+)			(+)	0.9														(-)	(-)
Kay MD et al, 2020 (15)	Female	17		wildtype																						(+)	(-)
Georgiu C et al, 2015 (16)	Female	11			wildtype																				focally positive (+)	(+)	(-)			0.1	0.4	0.1	less than 30%		(+)	(+)					(+)	(-)
Chen YT et al, 2018 (17)	Female	23	9 years, Dead	mutant	mutant									unmethylation											(+)	focal weak (+)										(+)
Hendrych M et al, 2023 (18)	Female	43		wildtype	mutant	wildtype	mutant							unmethylation	mutant	mutant	mutant	mutant			mutant				(+)	expression↑	expression↓			hotspots reaching up to 99%															(-)
Piña-Oviedo S et al, 2006 (19)	Male	54			mutant																		(+)			(+)	(-)					(+)	(+)
Maekawa K et al, 2021 (20)	Male	65		wildtype	mutant																			(+)	(+)	(+)	(-)	(+)	(-)			(+)	(+)				(-)	(-)			(+)	(+)			(-)	(-)	(-)	(-)
Le BH et al, 2010 (21)	Male	81	5 weeks, Dead																						(+)	(+)														faint (-)	(+)
Kandemir NO et al, 2009 (22)	Female	61	9 months, Alive																					(-)	(+)	(+)	(-)			0.1	0.65								(-)	(+)							(-)	(-)
Forbes V et al, 2016 (23)	Female	40	3 years, Alive																						(+)
Prelaj A et al, 2018 (24)	Male	60	10 months, Dead																						(+)	(+)					0.7		(+)
Karina A et al, 2012 (25)	Male	68		wildtype	mutant		mutant																	(-)	(+)	(+)	(-)			0.1	20%-30%	50%-60%	60%-65%			(+)			(-)	weak patchy (+)						(-)	(-)	(-)
Konar SK et al, 2017 (26)	Female	59	4.5 months, Dead	wildtype					noncodeletion					unmethylation											weakly (+)	(+)									(+)	(+)
Ricard JA et al, 2019 (27)	Male	37	12 years, Dead	wildtype
Alvarado AM et al, 2017 (28)	Male	42	8 months, Dead	wildtype	mutant		mutant		noncodeletion					unmethylation
Kuhn SA et al, 2007 (29)	Male	5	30 months, Alive
Wan KR et al, 2014 (30)	Male	47																						(-)	(+)	(+)	(-)
Liu J et al, 2016 (31)	Male	12		wildtype							wildtype				wildtype				wildtype						lesser extent (+)	(+)	(-)				＞60%							lesser extent (+)		lesser extent (+)	(+)	lesser extent (+)			(-)	(-)
[truncated: 45 more columns]
